# Supplementary material
Source: PubMed Central journal article supplement (PMC3057396)
Supplement: NIHMS269327-supplement-04.pdf [file NIHMS269327-supplement-04.pdf]

**Supplementary Table 1\_mRNA Expression in Kelly following miR-542-5p over-expression  
Genes Down-Regulated > 2 fold in two biological replicates**

| GeneName  | Mean change (2 repeats) | qPCR validation | TargetScan | PicTar | Microcosm |
|-----------|-------------------------|-----------------|------------|--------|-----------|
| C8orf49   | 0.17                    |                 |            |        |           |
| KIAA1618  | 0.22                    |                 |            |        |           |
| CDH7      | 0.25                    | No              |            |        |           |
| THAP5     | 0.26                    |                 |            |        |           |
| ZNF474    | 0.26                    |                 |            |        | Yes       |
| SYCP2     | 0.26                    |                 |            |        |           |
| LRRC6     | 0.26                    |                 |            |        |           |
| LOC440895 | 0.27                    |                 |            |        |           |
| NOS1      | 0.28                    |                 |            |        |           |
| PCDH10    | 0.28                    | No              | Yes        |        |           |
| ZNF406    | 0.28                    |                 |            |        |           |
| HAS2      | 0.30                    |                 |            |        |           |
| SCN9A     | 0.30                    |                 |            |        |           |
| IFIT1L    | 0.31                    |                 |            |        |           |
| LOC440080 | 0.31                    |                 |            |        |           |
| OR2T2     | 0.31                    |                 |            |        |           |
| HHLA3     | 0.31                    |                 |            |        |           |
| CUTL1     | 0.32                    |                 |            |        |           |
| KRT18     | 0.33                    |                 |            |        |           |
| LOC644764 | 0.33                    |                 |            |        |           |
| ALS2CR19  | 0.33                    |                 |            |        |           |
| ROPN1     | 0.35                    |                 |            |        |           |
| MAG11     | 0.35                    |                 |            |        |           |
| PCDHAC1   | 0.35                    |                 |            |        |           |
| LOC642943 | 0.36                    |                 |            |        |           |
| ERN1      | 0.36                    |                 |            |        |           |
| PCDHA5    | 0.36                    |                 |            |        |           |
| SH3GLB2   | 0.36                    | Yes             | Yes        |        |           |
| TMEM45A   | 0.37                    |                 |            |        |           |
| TAPBP     | 0.37                    |                 |            |        |           |
| MGC12965  | 0.38                    |                 |            |        |           |
| GSTM5     | 0.38                    |                 |            |        |           |
| FAM73B    | 0.38                    |                 |            |        |           |
| TSPAN11   | 0.38                    |                 |            |        |           |
| CD79A     | 0.38                    |                 |            |        |           |
| MTMR8     | 0.38                    |                 |            |        |           |
| CLEC4F    | 0.39                    |                 |            |        |           |
| STK33     | 0.39                    |                 |            |        |           |
| LOC644414 | 0.40                    |                 |            |        |           |
| MAGEE2    | 0.40                    |                 |            |        |           |
| LOC253820 | 0.40                    |                 |            |        |           |
| KRTAP19-1 | 0.40                    |                 |            |        |           |
| ERBB3     | 0.42                    |                 |            |        |           |
| SNAI2     | 0.42                    |                 |            |        |           |
| C9orf150  | 0.43                    |                 |            |        |           |
| DCD       | 0.43                    |                 |            |        |           |
| FLJ26056  | 0.44                    |                 |            |        |           |
| MAN1A1    | 0.44                    |                 |            |        |           |
| GRIN3A    | 0.44                    | Yes             | Yes        |        |           |
| LOC441126 | 0.44                    |                 |            |        |           |
| GALIG     | 0.44                    |                 |            |        |           |
| RGR       | 0.45                    |                 |            |        |           |

|          |      |  |     |  |  |
|----------|------|--|-----|--|--|
| KCNMA1   | 0.45 |  | Yes |  |  |
| NR4A3    | 0.46 |  |     |  |  |
| C17orf57 | 0.47 |  |     |  |  |
| SLC38A4  | 0.47 |  |     |  |  |
| PCDHB14  | 0.47 |  |     |  |  |
| SLC10A1  | 0.48 |  |     |  |  |
| ANKRD16  | 0.49 |  |     |  |  |

| GeneName  | Mean change (2 replicates) | qPCR validation |
|-----------|----------------------------|-----------------|
| OR2L3     | 10.65                      |                 |
| LOC401180 | 5.41                       |                 |
| SCN4A     | 4.67                       |                 |
| C1orf190  | 4.30                       |                 |
| CSDA      | 3.58                       |                 |
| PQBP1     | 3.40                       |                 |
| GPR50     | 3.29                       |                 |
| C10orf90  | 3.20                       |                 |
| KIR3DL1   | 3.17                       |                 |
| LOC644836 | 3.15                       |                 |
| SPA17     | 3.08                       |                 |
| SLC35A2   | 3.01                       |                 |
| ITGA8     | 2.93                       |                 |
| COLEC12   | 2.91                       |                 |
| CXCL12    | 2.90                       |                 |
| SNIP      | 2.90                       | Yes             |
| C15orf45  | 2.84                       |                 |
| LOC286208 | 2.80                       |                 |
| LOC285033 | 2.80                       |                 |
| MERTK     | 2.74                       |                 |
| C20orf46  | 2.71                       |                 |
| C17orf67  | 2.71                       |                 |
| CCDC83    | 2.66                       |                 |
| DYSF      | 2.65                       |                 |
| LOC92196  | 2.58                       |                 |
| REEP6     | 2.57                       |                 |
| TCEB3B    | 2.57                       |                 |
| LRRTM3    | 2.54                       |                 |
| C9orf21   | 2.43                       |                 |
| SERTAD3   | 2.42                       |                 |
| PGLYRP1   | 2.42                       |                 |
| DUSP23    | 2.41                       |                 |
| LOC644646 | 2.39                       |                 |
| SPECC1    | 2.38                       |                 |
| KIAA1822L | 2.38                       |                 |
| ANKRD6    | 2.32                       |                 |
| OR10G2    | 2.29                       |                 |
| C21orf49  | 2.29                       |                 |
| LOC643120 | 2.27                       |                 |
| OR4C3     | 2.24                       |                 |
| OR1F1     | 2.22                       |                 |
| IL4       | 2.16                       |                 |
| NXF3      | 2.16                       |                 |
| TAL1      | 2.09                       |                 |
| MOXD1     | 2.08                       |                 |

|      |      |  |
|------|------|--|
| SIX5 | 2.07 |  |
|------|------|--|
